# Supplementary material for: The influence of the electron transport layer on charge dynamics and trap-state properties in planar perovskite solar cells
Source: Royal Society of Chemistry journal article supplement (doi:10.1039/d0ra00375a), 2020-01-01
Supplement: d0ra00375a1.pdf [file d0ra00375a1.pdf]

# The influence of electron transport layer on charge dynamics and trap-state properties in planar perovskite solar cells

Man Yu<sup>1\*</sup>, Yanru Guo<sup>2</sup>, Shuai Yuan<sup>2</sup>, Jia-Shang Zhao<sup>2</sup>, Yujun Qin<sup>2\*</sup> and Xi-Cheng Ai<sup>2\*</sup>

<sup>1</sup>*School of Materials Engineering, Xi'an Aeronautical University, Xi'an 710077, China.*

<sup>2</sup>*Department of Chemistry, Renmin University of China, Beijing 100872, P. R. China*

\*E-mail: yuman@xaau.edu.cn (M. Yu), xcai@ruc.edu.cn (X.-C. Ai)

## S1. Experimental section

Laser-ablated FTO glass (Pilkington TEC-7, 7  $\Omega$ /sq) were successively rinsed with detergent, deionized water, acetone and ethanol by an ultrasonic bath for 20 min, respectively. Subsequently, the substrates were treated by oxygen plasma for 15 min. A thin compact TiO<sub>2</sub> (c-TiO<sub>2</sub>) layer was deposited on substrates by spin-coating 0.15 M titanium diisopropoxide in 1-butanol at 2500 rpm for 40 s, and then sintered at 500 °C for 1 h in an oven. For SnO<sub>2</sub> ETL, the SnO<sub>2</sub>·2H<sub>2</sub>O colloid precursor was purchased from Alfa Aesar (tin (IV) oxide, 15% in H<sub>2</sub>O colloidal dispersion), then 200  $\mu$ L SnO<sub>2</sub>·2H<sub>2</sub>O precursor is diluted by 1000  $\mu$ L ultrapure water before used. The final solution was spin coated onto FTO substrates at 3000 rpm for 30 s, and then baked on a hot plate at 150 °C for 30 min in air.

Briefly, the perovskite films are prepared by mixing CH<sub>3</sub>NH<sub>3</sub>I (1.1 M) and PbI<sub>2</sub> (1.15 M), in DMF: DMSO (4:1, v:v). The perovskite precursor solution is spin-coated in a two-step program at 1000 and 5000 rpm for 10 and 30 s, respectively. During the second step, 200  $\mu$ L of chlorobenzene was poured on the spinning substrate 15 s prior to the end of the program. Then, the as-fabricated films were baked at 100 °C for 1 h in a nitrogen filled glove box.

After the deposition of the perovskite layer, the hole transport layer (HTL) was coated at 4000 rpm for 30 s. The HTL solution was prepared by dissolving 72.3 mg of 2,2',7,7'-tetrakis(N,N-di-p-methoxyphenylamine)-9,9-spirobifluorene in 1 mL of chlorobenzene, to which 28.8  $\mu$ L of 4-*tert*-butylpyridine, 17.5  $\mu$ L of 520 mg mL<sup>-1</sup> lithium bis(trifluoromethylsulphonyl)imide in acetonitrile and 28.8  $\mu$ L of 300 mg mL<sup>-1</sup> tris(2-(1H-pyrazol-1-yl)-4-*tert*-butylpyridine)-cobalt(III) bis(trifluoromethylsulphonyl)imide in acetonitrile were added. Finally, an 80-nm-thick Au counter electrode was deposited by

thermal evaporation. Unless otherwise stated, all materials were purchased from Alfa Aesar and used as received.

## S2. Characterization of the perovskite films

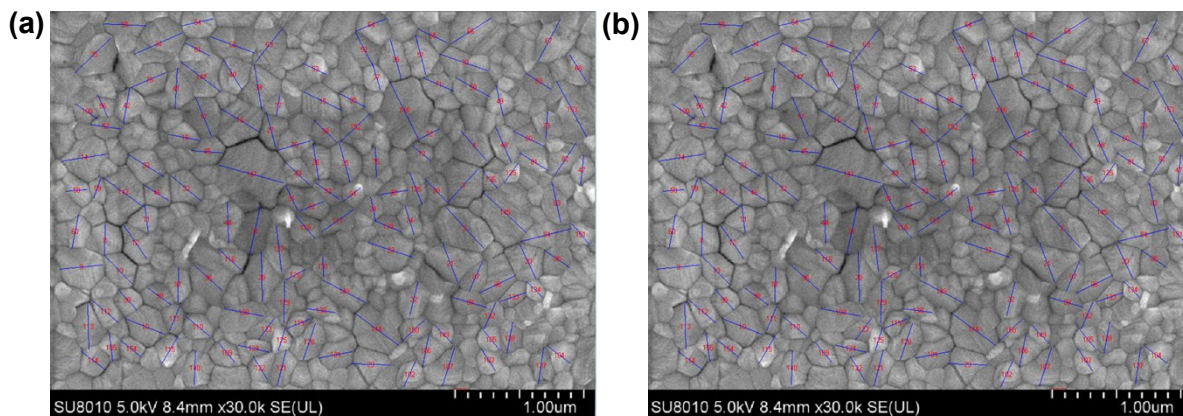

**Figure S1** Statistics of the perovskite grain sizes SEM images of two targeted perovskite films: (a)  $\text{TiO}_2$  and (b)  $\text{SnO}_2$ , respectively.

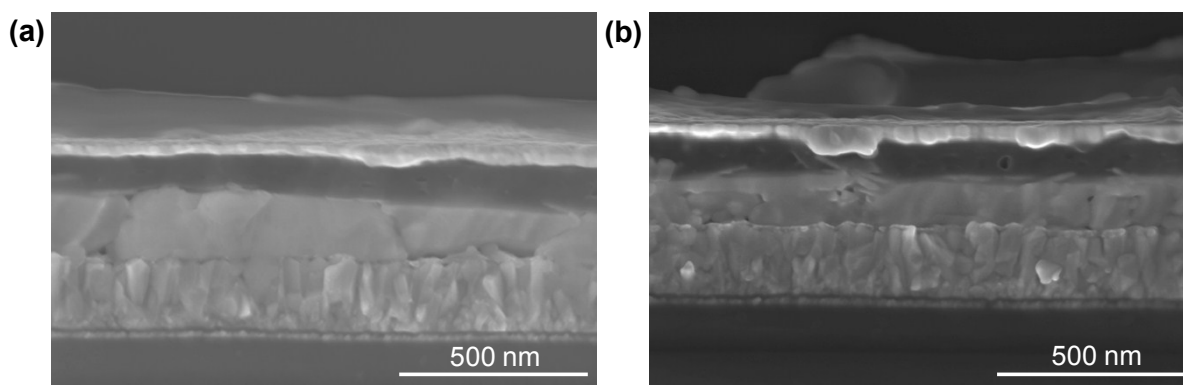

**Figure S2** Cross-section SEM images of devices based on  $\text{TiO}_2$  (a) and  $\text{SnO}_2$  ETL (b), respectively.

## S3. Transient photovoltage and transient photovoltage decay trace

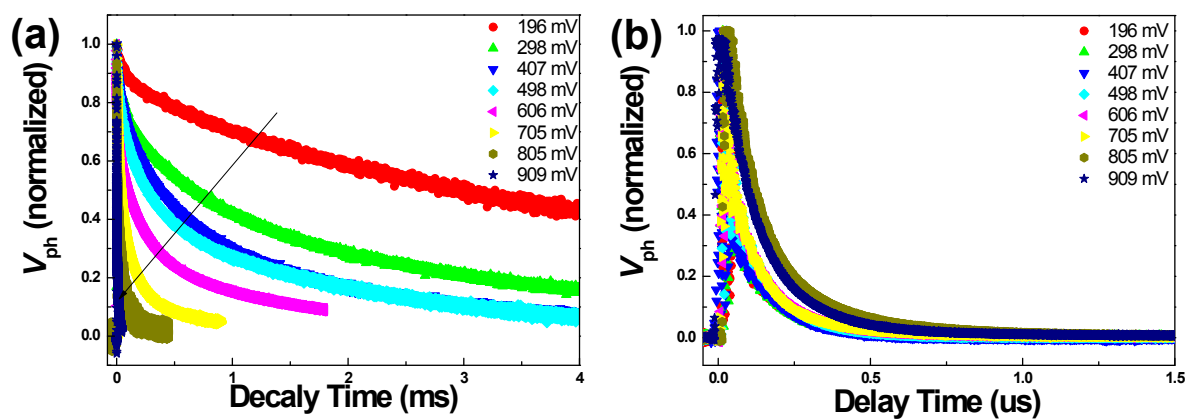

**Figure S3** (a) The normalized transient photovoltage decay traces of diverse desired steady-state

photovoltages, and (b) is the corresponding normalized transient photocurrent decay traces.

The trace of TPV is fitted by bi-exponential function is described as:  $V(t) = V_{\text{base}} + A_1 \exp(t/\tau_1) + A_2 \exp(t/\tau_2)$ , where  $V_{\text{base}}$  is the baseline,  $A_1$  and  $A_2$  are pre-exponential factors, and  $\tau_1$  and  $\tau_2$  are time constants. The charge carrier lifetime is calculated as  $\tau_n = (A_1 \tau_1 + A_2 \tau_2)/(A_1 + A_2)$ .<sup>1-3</sup> The results of the TPC is also fitted by the bi-exponential function. The corresponding charge carrier transport nearly exhibits a constant, which can be interpreted by the unique ambipolar transport property of the perovskite.

### S3. Time-resolved charge extraction trace

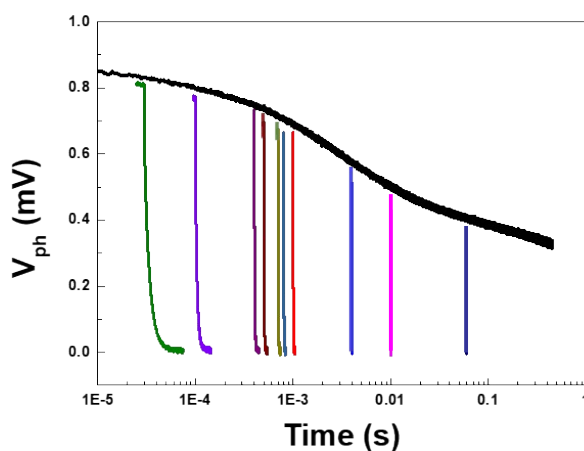

**Figure S4** Representative kinetics trace of the overall photovoltage ( $V_{\text{ph}}$ ) for an open-circuit perovskite solar cells device (thicker black line), and the charge extraction kinetics at indicated timing (thinner color lines) recorded by fast switching of the PSCs into short circuit.

The quantity of extracted charges ( $Q$ ) can be readily obtained by the integration,  $Q = R^{-1} \int V_{\text{ph}} dt$ , where  $R$  and  $V_{\text{ph}}$  stand for the sampling resistance (50  $\Omega$ ) and the photovoltage, respectively<sup>4,5</sup>.

### References

1. L. Luo, C. J. Lin, C. S. Hung, C. F. Lo, C. Y. Lin and E. W. Diau, *Phys.Chem.Chem.Phys.*, 2010, **12**, 12973-12977.
2. H. Y. Wang, Y. Wang, M. Yu, J. Han, Z. X. Guo, X. C. Ai, J. P. Zhang and Y. Qin, *Phys. Chem. Chem. Phys.*, 2016, **18**, 12128-12134.
3. M. Yu, Y. Wang, H.-Y. Wang, J. Han, Y. Qin, J.-P. Zhang and X.-C. Ai, *Chem. Phys. Lett.*, 2016, **662**, 257-262.
4. Y. Wang, D. Wu, L. M. Fu, X. C. Ai, D. Xu and J. P. Zhang, *Phys. Chem. Chem. Phys.*, 2014, **16**, 11626-11632.
5. Y. Wang, H. Y. Wang, M. Yu, L. M. Fu, Y. Qin, J. P. Zhang and X. C. Ai, *Phys. Chem. Chem. Phys.*,

2015, 17, 29501-29506.
